# Supplementary material
Source: publisher figshare collection journal article supplement (https://gsajournals.figshare.com/ndownloader/files/19071941)
Supplement: Supplementary file 1 [file 19071941]

## Sheet: Raw Data
Primer Set	Dilution	Target Name	Task	Reporter	Quencher	RQ	RQ Min	RQ Max	Cт	Cт Mean	Cт SD	ΔCт Mean	ΔCт SE	HK Control ΔCт Mean	HK Control ΔCт SE	ΔΔCт	Automatic Ct Threshold	Ct Threshold	Automatic Baseline	Baseline Start	Baseline End	Efficiency	Tm1	Tm2	Tm3	Comments	HIGHSD	NOAMP	EXPFAIL	MTP
ADHdist qPCR (ADHdist forward and ADHcommon reverse)	8^-1	ADH1 DIST (4333/4449)	UNKNOWN	SYBR	None	1	0.774054	1.2919	15.978	16.0296	0.18805	0.690291	0.133082			0	TRUE	2.14593	TRUE	1	2	1	80.6503				N	N	N	N
	8^-1	ADH1 DIST (4333/4449)	UNKNOWN	SYBR	None	1	0.774054	1.2919	16.238	16.0296	0.18805	0.690291	0.133082			0	TRUE	2.14593	TRUE	1	2	1	80.5011				N	N	N	N
	8^-1	ADH1 DIST (4333/4449)	UNKNOWN	SYBR	None	1	0.774054	1.2919	15.8727	16.0296	0.18805	0.690291	0.133082			0	TRUE	2.14593	TRUE	1	2	1	80.6515				N	N	N	N
	8^-2	ADH1 DIST (4333/4449)	UNKNOWN	SYBR	None	0.899486	0.658766	1.22817	19.0701	18.8684	0.182165	0.843119	0.161838			0.152828	TRUE	2.14593	TRUE	3	10	1	80.5024				N	N	N	N
	8^-2	ADH1 DIST (4333/4449)	UNKNOWN	SYBR	None	0.899486	0.658766	1.22817	18.8194	18.8684	0.182165	0.843119	0.161838			0.152828	TRUE	2.14593	TRUE	3	10	1	80.6516				N	N	N	N
	8^-2	ADH1 DIST (4333/4449)	UNKNOWN	SYBR	None	0.899486	0.658766	1.22817	18.7158	18.8684	0.182165	0.843119	0.161838			0.152828	TRUE	2.14593	TRUE	3	10	1	80.8008				N	N	N	N
	8^-3	ADH1 DIST (4333/4449)	UNKNOWN	SYBR	None	0.857059	0.529405	1.3875	22.0746	21.9056	0.211776	0.912825	0.250328			0.222534	TRUE	2.14593	TRUE	3	14	1	80.4986				N	N	N	N
	8^-3	ADH1 DIST (4333/4449)	UNKNOWN	SYBR	None	0.857059	0.529405	1.3875	21.9743	21.9056	0.211776	0.912825	0.250328			0.222534	TRUE	2.14593	TRUE	3	13	1	80.6478				N	N	N	N
	8^-3	ADH1 DIST (4333/4449)	UNKNOWN	SYBR	None	0.857059	0.529405	1.3875	21.668	21.9056	0.211776	0.912825	0.250328			0.222534	TRUE	2.14593	TRUE	3	13	1	80.8018				N	N	N	N
	8^-4	ADH1 DIST (4333/4449)	UNKNOWN	SYBR	None	0.691441	0.546529	0.874776	25.3518	25.333	0.0263833	1.22261	0.122209			0.532323	TRUE	2.14593	TRUE	3	17	1	80.5035				N	N	N	N
	8^-4	ADH1 DIST (4333/4449)	UNKNOWN	SYBR	None	0.691441	0.546529	0.874776	25.3444	25.333	0.0263833	1.22261	0.122209			0.532323	TRUE	2.14593	TRUE	3	17	1	80.3541				N	N	N	N
	8^-4	ADH1 DIST (4333/4449)	UNKNOWN	SYBR	None	0.691441	0.546529	0.874776	25.3029	25.333	0.0263833	1.22261	0.122209			0.532323	TRUE	2.14593	TRUE	3	16	1	80.3541				N	N	N	N
	8^-5	ADH1 DIST (4333/4449)	UNKNOWN	SYBR	None	0.81819	0.689623	0.970725	28.6561	28.7633	0.131023	0.979784	0.0888284			0.289493	TRUE	2.14593	TRUE	3	20	1	80.6503				N	N	N	N
	8^-5	ADH1 DIST (4333/4449)	UNKNOWN	SYBR	None	0.81819	0.689623	0.970725	28.7245	28.7633	0.131023	0.979784	0.0888284			0.289493	TRUE	2.14593	TRUE	3	20	1	80.6503				N	N	N	N
	8^-5	ADH1 DIST (4333/4449)	UNKNOWN	SYBR	None	0.81819	0.689623	0.970725	28.9094	28.7633	0.131023	0.979784	0.0888284			0.289493	TRUE	2.14593	TRUE	3	20	1	80.6515				N	N	N	N
	8^-6	ADH1 DIST (4333/4449)	UNKNOWN	SYBR	None	1.1809	0.630604	2.2114	32.0921	31.7801	0.439186	0.450408	0.325984			-0.239883	TRUE	2.14593	TRUE	3	24	1	80.3532				N	N	N	N
	8^-6	ADH1 DIST (4333/4449)	UNKNOWN	SYBR	None	1.1809	0.630604	2.2114	31.9704	31.7801	0.439186	0.450408	0.325984			-0.239883	TRUE	2.14593	TRUE	3	23	1	80.6516				N	N	N	N
	8^-6	ADH1 DIST (4333/4449)	UNKNOWN	SYBR	None	1.1809	0.630604	2.2114	31.2779	31.7801	0.439186	0.450408	0.325984			-0.239883	TRUE	2.14593	TRUE	3	23	1	80.6516				N	N	N	N
	8^-7	ADH1 DIST (4333/4449)	UNKNOWN	SYBR	None	2.68534	0.327757	22.0012	33.7863	34.2488	0.412733	-0.734812	1.09291			-1.4251	TRUE	2.14593	TRUE	3	25	1	80.3495				N	N	N	N
	8^-7	ADH1 DIST (4333/4449)	UNKNOWN	SYBR	None	2.68534	0.327757	22.0012	34.3805	34.2488	0.412733	-0.734812	1.09291			-1.4251	TRUE	2.14593	TRUE	3	26	1	80.4986				N	N	N	N
	8^-7	ADH1 DIST (4333/4449)	UNKNOWN	SYBR	None	2.68534	0.327757	22.0012	34.5796	34.2488	0.412733	-0.734812	1.09291			-1.4251	TRUE	2.14593	TRUE	3	26	1	80.5035				N	N	N	N
	water	ADH1 DIST (4333/4449)	UNKNOWN	SYBR	None				Undetermined								TRUE	2.14593	TRUE	3	39	1	61.5611	70.9577	80.2052		N	Y	Y	Y
	water	ADH1 DIST (4333/4449)	UNKNOWN	SYBR	None				Undetermined								TRUE	2.14593	TRUE	3	39	1	83.3375				N	Y	Y	N
	water	ADH1 DIST (4333/4449)	UNKNOWN	SYBR	None				Undetermined								TRUE	2.14593	TRUE	3	39	1	61.5585	89.7518	68.8679		N	N	Y	Y
ADHprox qPCR (ADHprox forward and ADHcommon reverse)	8-1	ChIP Primer D (4520/4449)	UNKNOWN	SYBR	None	1	0.72061	1.38771	16.5791	16.675	0.214692	-12.1563	0.170257			0	TRUE	3.0743	TRUE	1	2	1		N	N	N	N
	8-1	ChIP Primer D (4520/4449)	UNKNOWN	SYBR	None	1	0.72061	1.38771	16.9209	16.675	0.214692	-12.1563	0.170257			0	TRUE	3.0743	TRUE	3	7	1		N	N	N	N
	8-1	ChIP Primer D (4520/4449)	UNKNOWN	SYBR	None	1	0.72061	1.38771	16.5249	16.675	0.214692	-12.1563	0.170257			0	TRUE	3.0743	TRUE	1	2	1		N	N	N	N
	8-2	ChIP Primer D (4520/4449)	UNKNOWN	SYBR	None	0.883249	0.643165	1.21295	19.9697	19.7834	0.161831	-11.9772	0.164826			0.179108	TRUE	3.0743	TRUE	3	11	1		N	N	N	N
	8-2	ChIP Primer D (4520/4449)	UNKNOWN	SYBR	None	0.883249	0.643165	1.21295	19.6781	19.7834	0.161831	-11.9772	0.164826			0.179108	TRUE	3.0743	TRUE	3	10	1		N	N	N	N
	8-2	ChIP Primer D (4520/4449)	UNKNOWN	SYBR	None	0.883249	0.643165	1.21295	19.7024	19.7834	0.161831	-11.9772	0.164826			0.179108	TRUE	3.0743	TRUE	3	11	1		N	N	N	N
	8-3	ChIP Primer D (4520/4449)	UNKNOWN	SYBR	None	0.978607	0.772163	1.24024	22.9659	22.8364	0.115033	-12.1251	0.123116			0.0311991	TRUE	3.0743	TRUE	3	14	1		N	N	N	N
	8-3	ChIP Primer D (4520/4449)	UNKNOWN	SYBR	None	0.978607	0.772163	1.24024	22.7969	22.8364	0.115033	-12.1251	0.123116			0.0311991	TRUE	3.0743	TRUE	3	14	1		N	N	N	N
	8-3	ChIP Primer D (4520/4449)	UNKNOWN	SYBR	None	0.978607	0.772163	1.24024	22.7463	22.8364	0.115033	-12.1251	0.123116			0.0311991	TRUE	3.0743	TRUE	3	14	1		N	N	N	N
	8-4	ChIP Primer D (4520/4449)	UNKNOWN	SYBR	None				26.9697	26.8591	0.114998						TRUE	3.0743	TRUE	3	18	1		N	N	N	N
	8-4	ChIP Primer D (4520/4449)	UNKNOWN	SYBR	None				26.7402	26.8591	0.114998						TRUE	3.0743	TRUE	3	18	1		N	N	N	N
	8-4	ChIP Primer D (4520/4449)	UNKNOWN	SYBR	None				26.8675	26.8591	0.114998						TRUE	3.0743	TRUE	3	18	1		N	N	N	N
	8-5	ChIP Primer D (4520/4449)	UNKNOWN	SYBR	None	7.8325e-05	5.88469e-05	0.00010425	28.8793	28.6069	0.23837	1.4839	0.148574			13.6402	TRUE	3.0743	TRUE	3	19	1		N	N	N	N
	8-5	ChIP Primer D (4520/4449)	UNKNOWN	SYBR	None	7.8325e-05	5.88469e-05	0.00010425	28.5043	28.6069	0.23837	1.4839	0.148574			13.6402	TRUE	3.0743	TRUE	3	19	1		N	N	N	N
	8-5	ChIP Primer D (4520/4449)	UNKNOWN	SYBR	None	7.8325e-05	5.88469e-05	0.00010425	28.4369	28.6069	0.23837	1.4839	0.148574			13.6402	TRUE	3.0743	TRUE	3	19	1		N	N	N	N
	8-6	ChIP Primer D (4520/4449)	UNKNOWN	SYBR	None	0.00017837	0.000147412	0.000215829	30.699	30.7875	0.151808	0.296572	0.0990545			12.4528	TRUE	3.0743	TRUE	3	22	1		N	N	N	N
	8-6	ChIP Primer D (4520/4449)	UNKNOWN	SYBR	None	0.00017837	0.000147412	0.000215829	30.9627	30.7875	0.151808	0.296572	0.0990545			12.4528	TRUE	3.0743	TRUE	3	22	1		N	N	N	N
	8-6	ChIP Primer D (4520/4449)	UNKNOWN	SYBR	None	0.00017837	0.000147412	0.000215829	30.7006	30.7875	0.151808	0.296572	0.0990545			12.4528	TRUE	3.0743	TRUE	3	22	1		N	N	N	N
	8-7	ChIP Primer D (4520/4449)	UNKNOWN	SYBR	None	0.000189265	4.95812e-05	0.000722479	35.6311	35.9018	0.720423	0.211033	0.696051			12.3673	TRUE	3.0743	TRUE	3	27	1		Y	N	N	N
	8-7	ChIP Primer D (4520/4449)	UNKNOWN	SYBR	None	0.000189265	4.95812e-05	0.000722479	36.7183	35.9018	0.720423	0.211033	0.696051			12.3673	TRUE	3.0743	TRUE	3	28	1		Y	N	N	N
	8-7	ChIP Primer D (4520/4449)	UNKNOWN	SYBR	None	0.000189265	4.95812e-05	0.000722479	35.3559	35.9018	0.720423	0.211033	0.696051			12.3673	TRUE	3.0743	TRUE	3	26	1		Y	N	N	N
	water	ChIP Primer D (4520/4449)	UNKNOWN	SYBR	None				Undetermined								TRUE	3.0743	TRUE	3	39	1		N	Y	N	Y
	water	ChIP Primer D (4520/4449)	UNKNOWN	SYBR	None				Undetermined								TRUE	3.0743	TRUE	3	39	1		N	Y	N	Y
	water	ChIP Primer D (4520/4449)	UNKNOWN	SYBR	None				Undetermined								TRUE	3.0743	TRUE	3	39	1		N	Y	N	Y
⍺TUB84B (⍺TUB84B forward and ⍺TUB84B reverse)	8^-1	⍺TUB84B (4619/4620)	UNKNOWN	SYBR	None	1	0.704243	1.41996	15.4603	15.4768	0.0715085	-3.47648	0.182195			0	TRUE	0.0546501	TRUE	3	12	1	83.0438				N	N	N	N
	8^-1	⍺TUB84B (4619/4620)	UNKNOWN	SYBR	None	1	0.704243	1.41996	15.5551	15.4768	0.0715085	-3.47648	0.182195			0	TRUE	0.0546501	TRUE	3	12	1	82.5967				N	N	N	N
	8^-1	⍺TUB84B (4619/4620)	UNKNOWN	SYBR	None	1	0.704243	1.41996	15.415	15.4768	0.0715085	-3.47648	0.182195			0	TRUE	0.0546501	TRUE	3	12	1	83.044				N	N	N	N
	8^-2	⍺TUB84B (4619/4620)	UNKNOWN	SYBR	None	1.23354	0.948091	1.60494	18.5479	18.6186	0.197507	-3.77929	0.136762			-0.30281	TRUE	0.0546501	TRUE	3	15	1	82.7459				N	N	N	N
	8^-2	⍺TUB84B (4619/4620)	UNKNOWN	SYBR	None	1.23354	0.948091	1.60494	18.8417	18.6186	0.197507	-3.77929	0.136762			-0.30281	TRUE	0.0546501	TRUE	3	15	1	82.5959				N	N	N	N
	8^-2	⍺TUB84B (4619/4620)	UNKNOWN	SYBR	None	1.23354	0.948091	1.60494	18.4661	18.6186	0.197507	-3.77929	0.136762			-0.30281	TRUE	0.0546501	TRUE	3	15	1	82.894				N	N	N	N
	8^-3	⍺TUB84B (4619/4620)	UNKNOWN	SYBR	None	1.09138	1.02453	1.16259	22.3387	22.3684	0.0437396	-3.60263	0.0328458			-0.126153	TRUE	0.0546501	TRUE	3	19	1	82.5991				N	N	N	N
	8^-3	⍺TUB84B (4619/4620)	UNKNOWN	SYBR	None	1.09138	1.02453	1.16259	22.4186	22.3684	0.0437396	-3.60263	0.0328458			-0.126153	TRUE	0.0546501	TRUE	3	19	1	82.5991				N	N	N	N
	8^-3	⍺TUB84B (4619/4620)	UNKNOWN	SYBR	None	1.09138	1.02453	1.16259	22.3479	22.3684	0.0437396	-3.60263	0.0328458			-0.126153	TRUE	0.0546501	TRUE	3	19	1	82.747				N	N	N	N
	8^-4	⍺TUB84B (4619/4620)	UNKNOWN	SYBR	None	0.372475	0.233152	0.595053	25.4044	25.4906	0.301032	-2.05169	0.243432			1.42478	TRUE	0.0546501	TRUE	3	23	1	82.598				N	N	N	N
	8^-4	⍺TUB84B (4619/4620)	UNKNOWN	SYBR	None	0.372475	0.233152	0.595053	25.2455	25.4906	0.301032	-2.05169	0.243432			1.42478	TRUE	0.0546501	TRUE	3	23	1	82.4332				N	N	N	N
	8^-4	⍺TUB84B (4619/4620)	UNKNOWN	SYBR	None	0.372475	0.233152	0.595053	25.822	25.4906	0.301032	-2.05169	0.243432			1.42478	TRUE	0.0546501	TRUE	3	23	1	82.7317				N	N	N	N
	8^-5	⍺TUB84B (4619/4620)	UNKNOWN	SYBR	None	0.061785	0.0299811	0.127326	27.9119	27.8906	0.438442	0.540124	0.375733			4.0166	TRUE	0.0546501	TRUE	3	27	1	82.8947				N	N	N	N
	8^-5	⍺TUB84B (4619/4620)	UNKNOWN	SYBR	None	0.061785	0.0299811	0.127326	27.8534	27.8906	0.438442	0.540124	0.375733			4.0166	TRUE	0.0546501	TRUE	3	27	1	82.5967				N	N	N	N
	8^-5	⍺TUB84B (4619/4620)	UNKNOWN	SYBR	None	0.061785	0.0299811	0.127326	27.9065	27.8906	0.438442	0.540124	0.375733			4.0166	TRUE	0.0546501	TRUE	3	27	1	82.7459				N	N	N	N
	8^-6	⍺TUB84B (4619/4620)	UNKNOWN	SYBR	None	0.00285128	2.13932e-05	0.380016	37.1296	Undetermined	3.13636	4.9777	2.21789			8.45418	TRUE	0.0546501	TRUE	3	34	1	82.7459	70.5253			Y	N	N	N
	8^-6	⍺TUB84B (4619/4620)	UNKNOWN	SYBR	None				Undetermined	Undetermined	3.13636						TRUE	0.0546501	TRUE	3	39	1	61.5811	69.1822	91.5384		N	Y	N	Y
	8^-6	⍺TUB84B (4619/4620)	UNKNOWN	SYBR	None	0.00285128	2.13932e-05	0.380016	32.6941	Undetermined	3.13636	4.9777	2.21789			8.45418	TRUE	0.0546501	TRUE	3	29	1	82.894				Y	N	N	N
	8^-7	⍺TUB84B (4619/4620)	UNKNOWN	SYBR	None				Undetermined								TRUE	0.0546501	TRUE	3	39	1	61.585	70.0801	87.5173		N	Y	N	Y
	8^-7	⍺TUB84B (4619/4620)	UNKNOWN	SYBR	None				Undetermined								TRUE	0.0546501	TRUE	3	39	1	61.436	87.3683	82.003		N	Y	N	Y
	8^-7	⍺TUB84B (4619/4620)	UNKNOWN	SYBR	None				Undetermined								TRUE	0.0546501	TRUE	3	39	1	61.5825	89.6031	93.3293		N	Y	N	Y
	water	⍺TUB84B (4619/4620)	UNKNOWN	SYBR	None				Undetermined	39.9806							TRUE	0.0546501	TRUE	3	39	1	61.5825	83.6413	68.4386		N	Y	N	Y
	water	⍺TUB84B (4619/4620)	UNKNOWN	SYBR	None				Undetermined	39.9806							TRUE	0.0546501	TRUE	3	39	1	72.1366	62.7353	83.627		N	Y	N	Y
	water	⍺TUB84B (4619/4620)	UNKNOWN	SYBR	None	6.78571e-05			39.9806	39.9806		10.3707				13.8471	TRUE	0.0546501	TRUE	3	35	1	75.1211	64.526			N	N	N	N
ChIP Primer A (Adh A forward and Adh A reverse)	8^-1	ChIP Primer A (5172/4333)	UNKNOWN	SYBR	None				14.4026	13.6479	0.660557						TRUE	0.0411161	TRUE	3	10	1	77.1776				Y	N	N	N
	8^-1	ChIP Primer A (5172/4333)	UNKNOWN	SYBR	None				13.1745	13.6479	0.660557						TRUE	0.0411161	TRUE	3	10	1	77.327				Y	N	N	N
	8^-1	ChIP Primer A (5172/4333)	UNKNOWN	SYBR	None				13.3667	13.6479	0.660557						TRUE	0.0411161	TRUE	3	10	1	77.3263				Y	N	N	N
	8^-2	ChIP Primer A (5172/4333)	UNKNOWN	SYBR	None				15.5961	15.5125	0.198424						TRUE	0.0411161	TRUE	3	13	1	77.3263				N	N	N	N
	8^-2	ChIP Primer A (5172/4333)	UNKNOWN	SYBR	None				15.286	15.5125	0.198424						TRUE	0.0411161	TRUE	3	12	1	77.4764				N	N	N	N
	8^-2	ChIP Primer A (5172/4333)	UNKNOWN	SYBR	None				15.6555	15.5125	0.198424						TRUE	0.0411161	TRUE	3	13	1	77.327				N	N	N	N
	8^-3	ChIP Primer A (5172/4333)	UNKNOWN	SYBR	None				18.4468	18.4874	0.125882						TRUE	0.0411161	TRUE	3	16	1	77.4746				N	N	N	N
	8^-3	ChIP Primer A (5172/4333)	UNKNOWN	SYBR	None				18.6285	18.4874	0.125882						TRUE	0.0411161	TRUE	3	16	1	77.3252				N	N	N	N
	8^-3	ChIP Primer A (5172/4333)	UNKNOWN	SYBR	None				18.3867	18.4874	0.125882						TRUE	0.0411161	TRUE	3	15	1	77.476				N	N	N	N
	8^-4	ChIP Primer A (5172/4333)	UNKNOWN	SYBR	None				21.8837	22.0881	0.288966						TRUE	0.0411161	TRUE	3	19	1	77.3266				N	N	N	N
	8^-4	ChIP Primer A (5172/4333)	UNKNOWN	SYBR	None				21.9619	22.0881	0.288966						TRUE	0.0411161	TRUE	3	20	1	77.3269				N	N	N	N
	8^-4	ChIP Primer A (5172/4333)	UNKNOWN	SYBR	None				22.4187	22.0881	0.288966						TRUE	0.0411161	TRUE	3	19	1	77.1776				N	N	N	N
	8^-5	ChIP Primer A (5172/4333)	UNKNOWN	SYBR	None				26.4862	26.1354	0.333328						TRUE	0.0411161	TRUE	3	24	1	75.3856				N	N	N	N
	8^-5	ChIP Primer A (5172/4333)	UNKNOWN	SYBR	None				25.8228	26.1354	0.333328						TRUE	0.0411161	TRUE	3	23	1	77.327				N	N	N	N
	8^-5	ChIP Primer A (5172/4333)	UNKNOWN	SYBR	None				26.0973	26.1354	0.333328						TRUE	0.0411161	TRUE	3	23	1	77.3263				N	N	N	N
	8^-6	ChIP Primer A (5172/4333)	UNKNOWN	SYBR	None				28.9665	29.0665	0.862115						TRUE	0.0411161	TRUE	3	26	1	77.3263				Y	N	N	N
	8^-6	ChIP Primer A (5172/4333)	UNKNOWN	SYBR	None				30.462	29.0665	0.862115						TRUE	0.0411161	TRUE	3	28	1	77.1777				Y	N	Y	N
	8^-6	ChIP Primer A (5172/4333)	UNKNOWN	SYBR	None				28.9711	29.0665	0.862115						TRUE	0.0411161	TRUE	3	26	1	77.1777				Y	N	N	N
	8^-7	ChIP Primer A (5172/4333)	UNKNOWN	SYBR	None				Undetermined	34.391	3.9071						TRUE	0.0411161	TRUE	3	39	1	61.3474				N	Y	N	Y
	8^-7	ChIP Primer A (5172/4333)	UNKNOWN	SYBR	None				37.1537	34.391	3.9071						TRUE	0.0411161	TRUE	3	34	1	79.1171	61.4968			Y	N	N	N
	8^-7	ChIP Primer A (5172/4333)	UNKNOWN	SYBR	None				31.6282	34.391	3.9071						TRUE	0.0411161	TRUE	3	29	1	77.1773				Y	N	N	N
	water	ChIP Primer A (5172/4333)	UNKNOWN	SYBR	None				Undetermined								TRUE	0.0411161	TRUE	3	39	1	61.3494	78.6705			N	Y	N	Y
	water	ChIP Primer A (5172/4333)	UNKNOWN	SYBR	None				Undetermined								TRUE	0.0411161	TRUE	3	39	1	61.3452	70.3069	78.3724		N	Y	N	Y
	water	ChIP Primer A (5172/4333)	UNKNOWN	SYBR	None				Undetermined								TRUE	0.0411161	TRUE	3	39	1	61.3452				N	N	N	Y
ChIP Primer B (Adh B forward and Adh B reverse)	8^-1	ChIP Primer B (5212/5176)	UNKNOWN	SYBR	None	1	0.366523	2.72834	14.0437	13.3754	0.616177	-0.272526	0.521539			0	TRUE	0.0313492	TRUE	3	9	1	79.2684				Y	N	N	N
	8^-1	ChIP Primer B (5212/5176)	UNKNOWN	SYBR	None	1	0.366523	2.72834	13.2526	13.3754	0.616177	-0.272526	0.521539			0	TRUE	0.0313492	TRUE	3	10	1	79.119				Y	N	N	N
	8^-1	ChIP Primer B (5212/5176)	UNKNOWN	SYBR	None	1	0.366523	2.72834	12.8298	13.3754	0.616177	-0.272526	0.521539			0	TRUE	0.0313492	TRUE	3	10	1	79.4168				Y	N	N	N
	8^-2	ChIP Primer B (5212/5176)	UNKNOWN	SYBR	None	1.08551	0.749939	1.57123	15.2962	15.1216	0.26722	-0.390898	0.192162			-0.118371	TRUE	0.0313492	TRUE	3	13	1	79.4168				N	N	N	N
	8^-2	ChIP Primer B (5212/5176)	UNKNOWN	SYBR	None	1.08551	0.749939	1.57123	15.2547	15.1216	0.26722	-0.390898	0.192162			-0.118371	TRUE	0.0313492	TRUE	3	12	1	79.4177				N	N	N	N
	8^-2	ChIP Primer B (5212/5176)	UNKNOWN	SYBR	None	1.08551	0.749939	1.57123	14.814	15.1216	0.26722	-0.390898	0.192162			-0.118371	TRUE	0.0313492	TRUE	3	12	1	79.567				N	N	N	N
	8^-3	ChIP Primer B (5212/5176)	UNKNOWN	SYBR	None	1.06196	0.720741	1.56473	18.4054	18.1281	0.325331	-0.359259	0.201401			-0.0867322	TRUE	0.0313492	TRUE	3	16	1	79.2665				N	N	N	N
	8^-3	ChIP Primer B (5212/5176)	UNKNOWN	SYBR	None	1.06196	0.720741	1.56473	17.77	18.1281	0.325331	-0.359259	0.201401			-0.0867322	TRUE	0.0313492	TRUE	3	16	1	79.5651				N	N	N	N
	8^-3	ChIP Primer B (5212/5176)	UNKNOWN	SYBR	None	1.06196	0.720741	1.56473	18.2089	18.1281	0.325331	-0.359259	0.201401			-0.0867322	TRUE	0.0313492	TRUE	3	16	1	79.2678				N	N	N	N
	8^-4	ChIP Primer B (5212/5176)	UNKNOWN	SYBR	None	1.36773	0.924636	2.02315	21.28	21.3638	0.201631	-0.724307	0.203434			-0.451781	TRUE	0.0313492	TRUE	3	19	1	79.4171				N	N	N	N
	8^-4	ChIP Primer B (5212/5176)	UNKNOWN	SYBR	None	1.36773	0.924636	2.02315	21.2176	21.3638	0.201631	-0.724307	0.203434			-0.451781	TRUE	0.0313492	TRUE	3	19	1	79.418				N	N	N	N
	8^-4	ChIP Primer B (5212/5176)	UNKNOWN	SYBR	None	1.36773	0.924636	2.02315	21.5938	21.3638	0.201631	-0.724307	0.203434			-0.451781	TRUE	0.0313492	TRUE	3	19	1	79.2686				N	N	N	N
	8^-5	ChIP Primer B (5212/5176)	UNKNOWN	SYBR	None	1.58961	1.01573	2.48772	25.1996	25.1943	0.226671	-0.941196	0.232728			-0.668669	TRUE	0.0313492	TRUE	3	23	1	79.5671				N	N	N	N
	8^-5	ChIP Primer B (5212/5176)	UNKNOWN	SYBR	None	1.58961	1.01573	2.48772	24.965	25.1943	0.226671	-0.941196	0.232728			-0.668669	TRUE	0.0313492	TRUE	3	23	1	79.2684				N	N	N	N
	8^-5	ChIP Primer B (5212/5176)	UNKNOWN	SYBR	None	1.58961	1.01573	2.48772	25.4182	25.1943	0.226671	-0.941196	0.232728			-0.668669	TRUE	0.0313492	TRUE	3	23	1	79.4168				N	N	N	N
	8^-6	ChIP Primer B (5212/5176)	UNKNOWN	SYBR	None	1.19925	0.395631	3.63522	29.4174	28.9319	0.502919	-0.534662	0.576243			-0.262135	TRUE	0.0313492	TRUE	3	27	1	79.2675				Y	N	N	N
	8^-6	ChIP Primer B (5212/5176)	UNKNOWN	SYBR	None	1.19925	0.395631	3.63522	28.9651	28.9319	0.502919	-0.534662	0.576243			-0.262135	TRUE	0.0313492	TRUE	3	26	1	79.4177				Y	N	N	N
	8^-6	ChIP Primer B (5212/5176)	UNKNOWN	SYBR	None	1.19925	0.395631	3.63522	28.4132	28.9319	0.502919	-0.534662	0.576243			-0.262135	TRUE	0.0313492	TRUE	3	26	1	79.4177				Y	N	N	N
	8^-7	ChIP Primer B (5212/5176)	UNKNOWN	SYBR	None	1.55934	1.61774e-06	1.50305e+06	29.7745	33.4775	5.23685	-0.913464	4.62006			-0.640937	TRUE	0.0313492	TRUE	3	28	1	79.4158				Y	N	N	N
	8^-7	ChIP Primer B (5212/5176)	UNKNOWN	SYBR	None				Undetermined	33.4775	5.23685						TRUE	0.0313492	TRUE	3	39	1	70.0083	61.6461	89.8686		N	Y	N	Y
	8^-7	ChIP Primer B (5212/5176)	UNKNOWN	SYBR	None	1.55934	1.61774e-06	1.50305e+06	37.1805	33.4775	5.23685	-0.913464	4.62006			-0.640937	TRUE	0.0313492	TRUE	3	35	1	77.6253				Y	N	N	N
	no DNA	ChIP Primer B (5212/5176)	UNKNOWN	SYBR	None				39.0431	39.0431							TRUE	0.0313492	TRUE	3	35	1	70.6072	61.4987	90.0188		N	N	N	N
	no DNA	ChIP Primer B (5212/5176)	UNKNOWN	SYBR	None				Undetermined	39.0431							TRUE	0.0313492	TRUE	3	39	1	71.5018	61.7933	74.6384		N	Y	N	Y
	no DNA	ChIP Primer B (5212/5176)	UNKNOWN	SYBR	None				Undetermined	39.0431							TRUE	0.0313492	TRUE	3	39	1	61.1959	88.0809	69.4108		N	N	N	Y
ChIP Primer C (Adh C forward and Adh C reverse)	8^-1	ChIP Primer C (4366/4367)	UNKNOWN	SYBR	None	1	0.778251	1.28493	19.8477	19.8267	0.110143		5.60263	0.130272			0	TRUE	1.48569	TRUE	3	12	1	81.5375				N	N	N
	8^-1	ChIP Primer C (4366/4367)	UNKNOWN	SYBR	None	1	0.778251	1.28493	19.9248	19.8267	0.110143		5.60263	0.130272			0	TRUE	1.48569	TRUE	3	12	1	81.6866				N	N	N
	8^-1	ChIP Primer C (4366/4367)	UNKNOWN	SYBR	None	1	0.778251	1.28493	19.7076	19.8267	0.110143		5.60263	0.130272			0	TRUE	1.48569	TRUE	3	12	1	81.6918				N	N	N
	8^-2	ChIP Primer C (4366/4367)	UNKNOWN	SYBR	None	0.904097	0.695466	1.17531	22.4353	22.3452	0.16898		5.74809	0.136324			0.145451	TRUE	1.48569	TRUE	3	15	1	81.5426				N	N	N
	8^-2	ChIP Primer C (4366/4367)	UNKNOWN	SYBR	None	0.904097	0.695466	1.17531	22.4499	22.3452	0.16898		5.74809	0.136324			0.145451	TRUE	1.48569	TRUE	3	14	1	81.6754				N	N	N
	8^-2	ChIP Primer C (4366/4367)	UNKNOWN	SYBR	None	0.904097	0.695466	1.17531	22.1502	22.3452	0.16898		5.74809	0.136324			0.145451	TRUE	1.48569	TRUE	3	14	1	81.6754				N	N	N
	8^-3	ChIP Primer C (4366/4367)	UNKNOWN	SYBR	None	0.79429	0.687525	0.917635	25.6553	25.6334	0.114598		5.9349	0.0750074			0.332262	TRUE	1.48569	TRUE	3	18	1	81.6976				N	N	N
	8^-3	ChIP Primer C (4366/4367)	UNKNOWN	SYBR	None	0.79429	0.687525	0.917635	25.5095	25.6334	0.114598		5.9349	0.0750074			0.332262	TRUE	1.48569	TRUE	3	18	1	81.8467				N	N	N
	8^-3	ChIP Primer C (4366/4367)	UNKNOWN	SYBR	None	0.79429	0.687525	0.917635	25.7355	25.6334	0.114598		5.9349	0.0750074			0.332262	TRUE	1.48569	TRUE	3	18	1	81.6991				N	N	N
	8^-4	ChIP Primer C (4366/4367)	UNKNOWN	SYBR	None	0.822209	0.705061	0.958823	28.9556	28.9449	0.0414008		5.88506	0.0798713			0.282422	TRUE	1.48569	TRUE	3	21	1	81.55				N	N	N
	8^-4	ChIP Primer C (4366/4367)	UNKNOWN	SYBR	None	0.822209	0.705061	0.958823	28.8992	28.9449	0.0414008		5.88506	0.0798713			0.282422	TRUE	1.48569	TRUE	3	21	1	81.8446				N	N	N
	8^-4	ChIP Primer C (4366/4367)	UNKNOWN	SYBR	None	0.822209	0.705061	0.958823	28.98	28.9449	0.0414008		5.88506	0.0798713			0.282422	TRUE	1.48569	TRUE	3	21	1	81.5464				N	N	N
	8^-5	ChIP Primer C (4366/4367)	UNKNOWN	SYBR	None	0.976157	0.787947	1.20932	32.1882	32.1557	0.189629		5.63745	0.111299			0.0348142	TRUE	1.48569	TRUE	3	24	1	81.5375				N	N	N
	8^-5	ChIP Primer C (4366/4367)	UNKNOWN	SYBR	None	0.976157	0.787947	1.20932	32.327	32.1557	0.189629		5.63745	0.111299			0.0348142	TRUE	1.48569	TRUE	3	24	1	81.6866				N	N	N
	8^-5	ChIP Primer C (4366/4367)	UNKNOWN	SYBR	None	0.976157	0.787947	1.20932	31.9519	32.1557	0.189629		5.63745	0.111299			0.0348142	TRUE	1.48569	TRUE	3	24	1	81.5426				N	N	N
	8^-6	ChIP Primer C (4366/4367)	UNKNOWN	SYBR	None				N/A
	8^-6	ChIP Primer C (4366/4367)	UNKNOWN	SYBR	None				N/A
	8^-6	ChIP Primer C (4366/4367)	UNKNOWN	SYBR	None				N/A
	8^-7	ChIP Primer C (4366/4367)	UNKNOWN	SYBR	None				N/A
	8^-7	ChIP Primer C (4366/4367)	UNKNOWN	SYBR	None				N/A
	8^-7	ChIP Primer C (4366/4367)	UNKNOWN	SYBR	None				N/A
	no DNA	4366/4367	UNKNOWN	SYBR	None				Undetermined									TRUE	1.48569	TRUE	3	39	1	69.3075	61.5487	90.7936		N	Y	Y
	no DNA	4366/4367	UNKNOWN	SYBR	None				Undetermined									TRUE	1.48569	TRUE	3	39	1	81.6754	61.5109	92.2804		N	Y	Y
	no DNA	4366/4367	UNKNOWN	SYBR	None				Undetermined									TRUE	1.48569	TRUE	3	39	1	68.2324	73.9083	88.0981		N	Y	Y
ChIP Primer D (Adh D forward and Adh D reverse)	8-1	ChIP Primer D (4520/4449)	UNKNOWN	SYBR	None	1	0.72061	1.38771	16.5791	16.675	0.214692	-12.1563	0.170257			0	TRUE	3.0743	TRUE	1	2	1		N	N	N	N
	8-1	ChIP Primer D (4520/4449)	UNKNOWN	SYBR	None	1	0.72061	1.38771	16.9209	16.675	0.214692	-12.1563	0.170257			0	TRUE	3.0743	TRUE	3	7	1		N	N	N	N
	8-1	ChIP Primer D (4520/4449)	UNKNOWN	SYBR	None	1	0.72061	1.38771	16.5249	16.675	0.214692	-12.1563	0.170257			0	TRUE	3.0743	TRUE	1	2	1		N	N	N	N
	8-2	ChIP Primer D (4520/4449)	UNKNOWN	SYBR	None	0.883249	0.643165	1.21295	19.9697	19.7834	0.161831	-11.9772	0.164826			0.179108	TRUE	3.0743	TRUE	3	11	1		N	N	N	N
	8-2	ChIP Primer D (4520/4449)	UNKNOWN	SYBR	None	0.883249	0.643165	1.21295	19.6781	19.7834	0.161831	-11.9772	0.164826			0.179108	TRUE	3.0743	TRUE	3	10	1		N	N	N	N
	8-2	ChIP Primer D (4520/4449)	UNKNOWN	SYBR	None	0.883249	0.643165	1.21295	19.7024	19.7834	0.161831	-11.9772	0.164826			0.179108	TRUE	3.0743	TRUE	3	11	1		N	N	N	N
	8-3	ChIP Primer D (4520/4449)	UNKNOWN	SYBR	None	0.978607	0.772163	1.24024	22.9659	22.8364	0.115033	-12.1251	0.123116			0.0311991	TRUE	3.0743	TRUE	3	14	1		N	N	N	N
	8-3	ChIP Primer D (4520/4449)	UNKNOWN	SYBR	None	0.978607	0.772163	1.24024	22.7969	22.8364	0.115033	-12.1251	0.123116			0.0311991	TRUE	3.0743	TRUE	3	14	1		N	N	N	N
	8-3	ChIP Primer D (4520/4449)	UNKNOWN	SYBR	None	0.978607	0.772163	1.24024	22.7463	22.8364	0.115033	-12.1251	0.123116			0.0311991	TRUE	3.0743	TRUE	3	14	1		N	N	N	N
	8-4	ChIP Primer D (4520/4449)	UNKNOWN	SYBR	None				26.9697	26.8591	0.114998						TRUE	3.0743	TRUE	3	18	1		N	N	N	N
	8-4	ChIP Primer D (4520/4449)	UNKNOWN	SYBR	None				26.7402	26.8591	0.114998						TRUE	3.0743	TRUE	3	18	1		N	N	N	N
	8-4	ChIP Primer D (4520/4449)	UNKNOWN	SYBR	None				26.8675	26.8591	0.114998						TRUE	3.0743	TRUE	3	18	1		N	N	N	N
	8-5	ChIP Primer D (4520/4449)	UNKNOWN	SYBR	None	7.8325e-05	5.88469e-05	0.00010425	28.8793	28.6069	0.23837	1.4839	0.148574			13.6402	TRUE	3.0743	TRUE	3	19	1		N	N	N	N
	8-5	ChIP Primer D (4520/4449)	UNKNOWN	SYBR	None	7.8325e-05	5.88469e-05	0.00010425	28.5043	28.6069	0.23837	1.4839	0.148574			13.6402	TRUE	3.0743	TRUE	3	19	1		N	N	N	N
	8-5	ChIP Primer D (4520/4449)	UNKNOWN	SYBR	None	7.8325e-05	5.88469e-05	0.00010425	28.4369	28.6069	0.23837	1.4839	0.148574			13.6402	TRUE	3.0743	TRUE	3	19	1		N	N	N	N
	8-6	ChIP Primer D (4520/4449)	UNKNOWN	SYBR	None	0.00017837	0.000147412	0.000215829	30.699	30.7875	0.151808	0.296572	0.0990545			12.4528	TRUE	3.0743	TRUE	3	22	1		N	N	N	N
	8-6	ChIP Primer D (4520/4449)	UNKNOWN	SYBR	None	0.00017837	0.000147412	0.000215829	30.9627	30.7875	0.151808	0.296572	0.0990545			12.4528	TRUE	3.0743	TRUE	3	22	1		N	N	N	N
	8-6	ChIP Primer D (4520/4449)	UNKNOWN	SYBR	None	0.00017837	0.000147412	0.000215829	30.7006	30.7875	0.151808	0.296572	0.0990545			12.4528	TRUE	3.0743	TRUE	3	22	1		N	N	N	N
	8-7	ChIP Primer D (4520/4449)	UNKNOWN	SYBR	None	0.000189265	4.95812e-05	0.000722479	35.6311	35.9018	0.720423	0.211033	0.696051			12.3673	TRUE	3.0743	TRUE	3	27	1		Y	N	N	N
	8-7	ChIP Primer D (4520/4449)	UNKNOWN	SYBR	None	0.000189265	4.95812e-05	0.000722479	36.7183	35.9018	0.720423	0.211033	0.696051			12.3673	TRUE	3.0743	TRUE	3	28	1		Y	N	N	N
	8-7	ChIP Primer D (4520/4449)	UNKNOWN	SYBR	None	0.000189265	4.95812e-05	0.000722479	35.3559	35.9018	0.720423	0.211033	0.696051			12.3673	TRUE	3.0743	TRUE	3	26	1		Y	N	N	N
	water	ChIP Primer D (4520/4449)	UNKNOWN	SYBR	None				Undetermined								TRUE	3.0743	TRUE	3	39	1		N	Y	N	Y
	water	ChIP Primer D (4520/4449)	UNKNOWN	SYBR	None				Undetermined								TRUE	3.0743	TRUE	3	39	1		N	Y	N	Y
	water	ChIP Primer D (4520/4449)	UNKNOWN	SYBR	None				Undetermined								TRUE	3.0743	TRUE	3	39	1		N	Y	N	Y
ChIP Primer E (ADH E forward and ADH E reverse)	8^-1	ChIP Primer E (3209/3210)	UNKNOWN	SYBR	None				15.4752	15.3393	0.133302						TRUE	0.191461	TRUE	3	7	1	84.827				N	N	N	N
	8^-1	ChIP Primer E (3209/3210)	UNKNOWN	SYBR	None				15.2088	15.3393	0.133302						TRUE	0.191461	TRUE	3	9	1	84.3795				N	N	N	N
	8^-1	ChIP Primer E (3209/3210)	UNKNOWN	SYBR	None				15.3339	15.3393	0.133302						TRUE	0.191461	TRUE	3	9	1	84.3808				N	N	N	N
	8^-2	ChIP Primer E (3209/3210)	UNKNOWN	SYBR	None				18.2627	18.0253	0.21305						TRUE	0.191461	TRUE	3	13	1	84.5299				N	N	N	N
	8^-2	ChIP Primer E (3209/3210)	UNKNOWN	SYBR	None				17.9623	18.0253	0.21305						TRUE	0.191461	TRUE	3	13	1	84.5299				N	N	N	N
	8^-2	ChIP Primer E (3209/3210)	UNKNOWN	SYBR	None				17.8508	18.0253	0.21305						TRUE	0.191461	TRUE	3	13	1	84.3807				N	N	N	N
	8^-3	ChIP Primer E (3209/3210)	UNKNOWN	SYBR	None				21.4237	20.9928	0.378343						TRUE	0.191461	TRUE	3	16	1	84.5255				N	N	N	N
	8^-3	ChIP Primer E (3209/3210)	UNKNOWN	SYBR	None				20.7151	20.9928	0.378343						TRUE	0.191461	TRUE	3	16	1	84.2272				N	N	N	N
	8^-3	ChIP Primer E (3209/3210)	UNKNOWN	SYBR	None				20.8396	20.9928	0.378343						TRUE	0.191461	TRUE	3	16	1	84.3815				N	N	N	N
	8^-4	ChIP Primer E (3209/3210)	UNKNOWN	SYBR	None				24.2411	24.1104	0.210022						TRUE	0.191461	TRUE	3	19	1	84.3815				N	N	N	N
	8^-4	ChIP Primer E (3209/3210)	UNKNOWN	SYBR	None				24.222	24.1104	0.210022						TRUE	0.191461	TRUE	3	19	1	84.2325				N	N	N	N
	8^-4	ChIP Primer E (3209/3210)	UNKNOWN	SYBR	None				23.8682	24.1104	0.210022						TRUE	0.191461	TRUE	3	19	1	84.3817				N	N	N	N
	8^-5	ChIP Primer E (3209/3210)	UNKNOWN	SYBR	None				27.843	27.7835	0.08065						TRUE	0.191461	TRUE	3	23	1	84.6778				N	N	N	N
	8^-5	ChIP Primer E (3209/3210)	UNKNOWN	SYBR	None				27.8159	27.7835	0.08065						TRUE	0.191461	TRUE	3	23	1	84.5286				N	N	N	N
	8^-5	ChIP Primer E (3209/3210)	UNKNOWN	SYBR	None				27.6917	27.7835	0.08065						TRUE	0.191461	TRUE	3	23	1	84.3808				N	N	N	N
	8^-6	ChIP Primer E (3209/3210)	UNKNOWN	SYBR	None				31.5212	30.3297	0.354842						TRUE	0.191461	TRUE	3	26	1	84.5299				N	N	N	N
	8^-6	ChIP Primer E (3209/3210)	UNKNOWN	SYBR	None				30.9202	30.3297	0.354842						TRUE	0.191461	TRUE	3	26	1	84.3807				N	N	N	N
	8^-6	ChIP Primer E (3209/3210)	UNKNOWN	SYBR	None				31.5476	30.3297	0.354842						TRUE	0.191461	TRUE	3	26	1	84.3807				N	N	N	N
	8^-7	ChIP Primer E (3209/3210)	UNKNOWN	SYBR	None				37.0577	33.9836	1.84743						TRUE	0.191461	TRUE	3	32	1	84.3764	69.9094			Y	N	N	Y
	8^-7	ChIP Primer E (3209/3210)	UNKNOWN	SYBR	None				34.3784	33.9836	1.84743						TRUE	0.191461	TRUE	3	29	1	84.3764				Y	N	N	N
	8^-7	ChIP Primer E (3209/3210)	UNKNOWN	SYBR	None				33.5147	33.9836	1.84743						TRUE	0.191461	TRUE	3	28	1	84.3815	71.1069			Y	N	N	Y
	water	ChIP Primer E (3209/3210)	UNKNOWN	SYBR	None				Undetermined	33.1082	1.63733						TRUE	0.191461	TRUE	3	39	1	70.6594	61.8594	87.6628		N	Y	Y	Y
	water	ChIP Primer E (3209/3210)	UNKNOWN	SYBR	None				34.266	33.1082	1.63733						TRUE	0.191461	TRUE	3	29	1	75.8789				Y	N	N	N
	water	ChIP Primer E (3209/3210)	UNKNOWN	SYBR	None				31.9504	33.1082	1.63733						TRUE	0.191461	TRUE	3	27	1	76.774				Y	N	N	N

## Sheet: Efficiency Quantification
RT-qPCR primers									ChIP primers
ADHdist qPCR (ADHdist forward and ADHcommon reverse)									ChIP Primer A (ADH A forward and ADH A reverse)
Dilution(-log2)	CT Mean								Dilution(-log2)	CT Mean
3	16.0296								3	13.6479
6	18.8684								6	15.5125
9	21.9056								9	18.4874
12	25.333								12	22.0881
15	28.7633								15	26.1354
18	31.7801								18	29.0665
21	34.2488								21	undetermined
ADHprox qPCR (ADHprox forward and ADHcommon reverse)									ChIP Primer B (ADH B forward and ADH B reverse)
Dilution(-log2)	CT Mean								Dilution(-log2)	CT Mean
3	16.675								3	13.3754
6	19.7834								6	15.1216
9	22.8364								9	18.1281
12	26.8591								12	21.3638
15	28.6069								15	25.1943
18	30.7875								18	28.9319
21	35.9018								21	undetermined
⍺TUB84B qPCR (⍺TUB84B forward and ⍺TUB84B reverse)									ChIP Primer C (ADH C forward and ADH C reverse)
Dilution(-log2)	CT Mean								Dilution(-log2)	CT Mean
3	15.4768								3	19.8267
6	18.6186								6	22.3452
9	22.3684								9	25.6334
12	25.4906								12	28.9449
15	27.8906								15	32.1557
18	undetermined								18	Undetermined
21	undetermined								21	Undetermined
									ChIP Primer D (ADH D forward and ADH D reverse)
									Dilution(-log2)	CT Mean
									3	16.675
									6	19.7834
									9	22.8364
									12	26.8591
									15	28.6069
									18	30.7875
									21	35.9018
									ChIP Primer E (ADH E forward and ADH E reverse)
									Dilution(-log2)	CT Mean
									3	15.3393
									6	18.0253
									9	20.9928
									12	24.1104
									15	27.7835
									18	30.3297
									21	33.9836
